# Supplementary material for: The influence of sexual activity on the vaginal microbiota and Gardnerella vaginalis clade diversity in young women
Source: PubMed Central journal article supplement (PMC5325229; doi:10.1371/journal.pone.0171856), 2017-02-24
Supplement: pone.0171856.s001.pdf [file pone.0171856.s001.pdf]

**Supplementary Table 1. Number of specimens from women by each dominant bacterial spp. and each sexual activity category**

| Dominant bacterial spp. in each specimen <sup>a</sup>  | Sexual activity category, n (%) |                              |                           | Total specimens per dominant spp. group, n (%) (N=184) |         |         |
|--------------------------------------------------------|---------------------------------|------------------------------|---------------------------|--------------------------------------------------------|---------|---------|
|                                                        | no sexual activity (N=60)       | non-coital activities (N=53) | penile-vaginal sex (N=68) |                                                        |         |         |
|                                                        | <i>L. crispatus</i>             | 21 (30)                      | 19 (27)                   |                                                        | 30 (43) | 70 (38) |
|                                                        | <i>L. iners</i>                 | 12 (21)                      | 21 (37)                   |                                                        | 24 (42) | 57 (31) |
| <i>L. gasseri</i> or <i>L. jensenii</i> <sup>b</sup>   | 10 (63)                         | 2 (13)                       | 4 (25)                    | 16 (9)                                                 |         |         |
| <i>G. vaginalis</i>                                    | 6 (35)                          | 3 (18)                       | 8 (47)                    | 17 (9)                                                 |         |         |
| Other heterogeneous non-lactobacilli spp. <sup>c</sup> | 11 (46)                         | 11 (46)                      | 2 (8)                     | 24 (13)                                                |         |         |

<sup>a</sup>The median abundance of each dominant spp. was as follows: *L. crispatus* 96.2% (IQR=83.2-98.7), *L. iners* 91.4% (IQR=76.3-99.3), other *Lactobacillus* spp. 75.8% (IQR=53.2-88.4), *G. vaginalis* 65.6% (IQR=57.3-85.0), other heterogeneous non-lactobacilli spp. 51.4% (IQR=36.9-74.6); <sup>b</sup>*L. gasseri* and *L. jensenii* dominant specimens were combined due to lower numbers in both groups; <sup>c</sup>other heterogeneous non-lactobacilli spp. were predominately *Atopobium vaginae* and *Prevotella* spp.
